# Supplementary material for: Tuning colloidal gels by shear
Source: Royal Society of Chemistry journal article supplement (doi:10.1039/c5sm00411j), 2015-01-01
Supplement: c5sm00411j2.pdf [file c5sm00411j2.pdf]

$$R_{void} = \left| \vec{r}_{dV} - \vec{r}_{sphere} \right| - R_{sphere}$$

$$V_{void} = VV = \frac{4}{3} \pi R_{void}^3$$

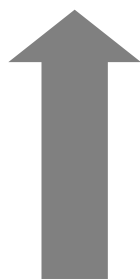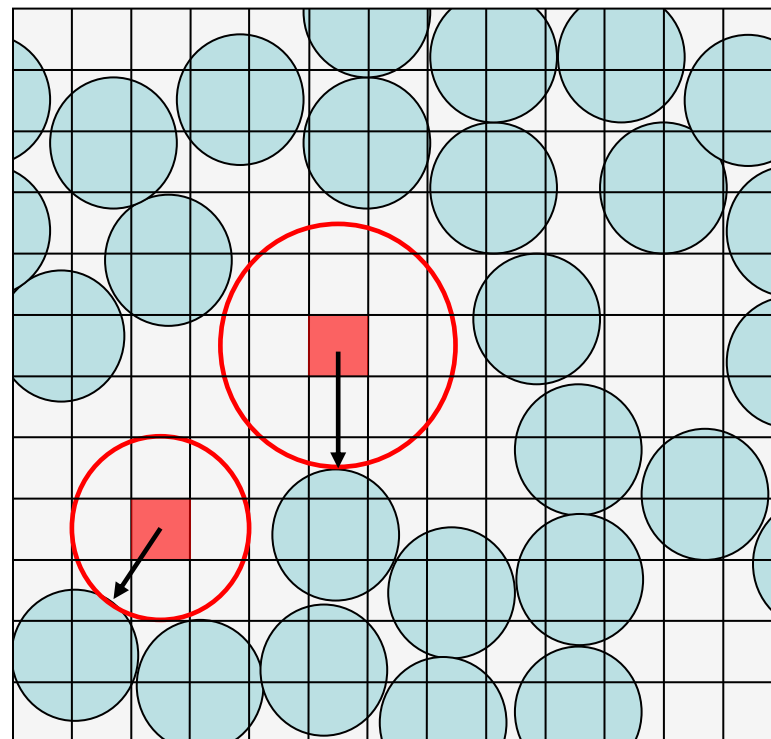

Unoccupied space is divided in small  $dV$  (red squares) and the distance to the nearest particle is calculated. The corresponding void volume ( $VV$ ) is depicted with the red circles.

Generally:

$$dV \ll R_{void}^3$$
